# Supplementary material for: Age interaction in associations between geriatric nutritional risk index and prognosis in diffuse large B-cell lymphoma
Source: Research Square preprint supplement (doi:10.21203/rs.3.rs-6492181/v1), 2025-05-07
Supplement: Supplementary file 1 [file 1398a050d81c72612242634e.docx]

**Supplementary figure 1. Flow chart of patient selection.**

CNS = central nervous system; DLBCL = diffuse large B-cell lymphoma.

**Supplementary figure 2. Association between GNRI and all-cause mortality risk using a multivariable Cox hazards model with restricted cubic spline with 3 knots in each of the survival and dead patient groups.**

The solid line represents the log hazard ratio, and the shaded area shows the 95% confidence interval. GNRI = geriatric nutritional risk index.

**Supplementary figure 3. Association between GNRI and overall survival according to age using a multivariate Cox hazards model with restricted cubic spline with 3 knots.**

(a) The blue line indicates younger patients <65 years, the red line indicates older patients ≥65 years.

(b) The blue line indicates younger patients <70 years, the red line indicates older patients ≥70 years.

The solid line represents the log hazard ratio, and the shaded area shows the 95% confidence interval. GNRI = geriatric nutritional risk index.

**Supplementary figure 4. Receiver operating characteristic curve showing the prognostic impact of GNRI.**

(a) The blue line indicates younger patients <65 years, the red line indicates older patients ≥65 years.

(b) The blue line indicates younger patients <70 years, the red line indicates older patients ≥70 years.

AUC = area under the curve. CI = confidence interval.

**Supplementary figure 5. Scatter plots of serum albumin levels and body mass index in the patients with low GNRI under than 92 (n = 271).**

The black scatter indicates younger patients <75 years (n = 110), the blue scatter indicates older patients ≥75 years (n = 161).

Alb = albumin; BMI = body mass index; GNRI = geriatric nutritional risk index.

**Supplementary figure 6. Density plots of serum albumin levels and body mass index in the patients with low GNRI under than 92 (n = 271).**

The black line indicates younger patients <75 years (n = 110), the blue line indicates older patients ≥75 years (n = 161).

Alb = albumin; BMI = body mass index; GNRI = geriatric nutritional risk index.

**Supplementary figure 7. Distributions of serum Alb and BMI in patients with low GNRI <92 between younger and older patients (<65 years and ≥65 years) (n = 271).**

(a) Scatter plots. (b) Density plots.

Black scatters and lines indicate younger patients, red scatters and lines indicate older patients.

Alb = albumin. BMI = body mass index. GNRI = geriatric nutritional risk index.

**Supplementary figure 8. Distributions of serum Alb and BMI in patients with low GNRI <92 between younger and older patients (<70 years and ≥70 years) (n = 271).**

**(a) Scatter plots. (b) Density plots.**

Black scatters and lines indicate younger patients, red scatters and lines indicate older patients.

Alb = albumin. BMI = body mass index. GNRI = geriatric nutritional risk index.

**Supplementary table 1. Patient characteristics at diagnosis compared between younger and older adults, using an age threshold of 75 years.**

|  | All patients  (*N* = 552) | | Age <75  (*n* = 293) | | Age ≥75  (*n* = 259) | | *P* value |
| --- | --- | --- | --- | --- | --- | --- | --- |
| Age, year - median, range | 74 | (18–96) | 66 | (18–74) | 81 | (75–96) | <0.001 |
| Male - n (%) | 281 | (50.9) | 159 | (54.3) | 122 | (47.1) | 0.105 |
| ECOG PS ≥2 - n (%) | 169 | (60.6) | 60 | (20.5) | 109 | (42.1) | <0.001 |
| LDH >UNL - n (%) | 357 | (64.7) | 178 | (60.8) | 179 | (69.1) | 0.049 |
| Stage ≥3 - n (%) | 362 | (65.6) | 183 | (62.5) | 179 | (69.1) | 0.107 |
| Extranodal sites ≥2 - n (%) | 209 | (37.9) | 103 | (35.2) | 106 | (40.9) | 0.160 |
| IPI, score - median, range | 3 | (0–5) | 2 | (0–5) | 3 | (1–5) | <0.001 |
| IPI, category - n (%) |  |  |  |  |  |  |  |
| Low | 121 | (21.9) | 86 | (29.3) | 35 | (13.5) | <0.001 |
| Low-intermediate | 114 | (20.6) | 67 | (22.9) | 47 | (18.2) |  |
| High-intermediate | 108 | (19.6) | 58 | (19.8) | 50 | (19.3) |  |
| High | 209 | (37.9) | 82 | (28.0) | 127 | (49.0) |  |
| B symptoms - n (%) | 159 | (28.8) | 76 | (25.9) | 83 | (49.0) | 0.132 |
| Bulky mass - n (%) | 127 | (23.0) | 70 | (23.9) | 57 | (32.1) | 0.685 |
| sIL-2R, U/mL - median, range | 1,497 | (125–39,410) | 1,248 | (125–38,400) | 1,855 | (184–39,410) | 0.001 |
| Body mass index, kg/m2 - median, range | 22.2 | (12.8–36.7) | 22.4 | (14.8–36.7) | 21.8 | (12.8–33.5) | 0.003 |
| Serum albumin - median, range | 3.6 | (1.1–5.6) | 3.8 | (1.1–5.6) | 3.3 | (1.4–5.1) | <0.001 |
| GNRI score - median, range | 92.3 | (51.5–120.3) | 96.8 | (51.5–120.3) | 88.5 | (58.7–117.6) | <0.001 |
| CCI score - median, range | 1 | (0–8) | 1 | (0–8) | 1 | (0–8) | <0.001 |

CCI, Charlson Comorbidity Index; ECOG PS, Eastern Cooperative Oncology Group performance status; GNRI, geriatric nutritional risk index; IPI, International Prognostic Index; LDH, lactate dehydrogenase; sIL-2R, soluble interleukin-2 receptor; ULN, upper limit of normal.

**Supplementary table 2. The proportion of undernutrition in older and younger populations.**

|  | Low GNRI (<92), n (%) | *P* value | |
| --- | --- | --- | --- |
| Age ≥65 (N = 420) | 226 (53.8) | <0.001 |
| Age <65 (N = 132) | 45 (34.1) |  |
| Age ≥70 (N = 349) | 194 (55.6) | <0.001 |
| Age <70 (N = 203) | 77 (37.9) |  |
| Age ≥75 (N = 259) | 161 (62.2) | <0.001 |
| Age <75 (N = 293) | 110 (37.5) |  |

GNRI, Geriatric Nutritional Risk Index.

**Supplementary table 3. Pattern of parameter anomalies leading to low GNRI (<92) between older and younger populations.**

| GNRI <92 (N = 271) | Age <65 (N = 45), n (%) | Age ≥65 (N = 226), n (%) | *P* value |
| --- | --- | --- | --- |
| Serum Alb <3.0 | 14 (31.1) | 75 (33.2) |  |
| BMI <19 | 8 (17.8) | 32 (14.2) | 0.839 |
| Serum Alb <3.0 and BMI <19 | 3 (6.7) | 23 (10.2) |  |
| Serum Alb ≥3.0 and BMI ≥19 | 20 (44.4) | 96 (41.4) |  |
| GNRI <92 (N = 271) | Age <70 (n = 77) | Age ≥65 (n = 194) | *P* value |
| Serum Alb <3.0 | 25 (32.5) | 64 (33.0) |  |
| BMI <19 | 10 (13.0) | 30 (15.5) | 0.957 |
| Serum Alb <3.0 and BMI <19 | 8 (10.4) | 18 (9.3) |  |
| Serum Alb ≥3.0 and BMI ≥19 | 34 (44.1) | 82 (42.2) |  |
| GNRI <92 (N = 271) | Age <65 (n = 110) | Age ≥65 (n = 161) | *P* value |
| Serum Alb <3.0 | 36 (32.7) | 53 (32.9) |  |
| BMI <19 | 13 (11.8) | 27 (16.8) | 0.652 |
| Serum Alb <3.0 and BMI <19 | 10 (9.1) | 16 (9.9) |  |
| Serum Alb ≥3.0 and BMI ≥19 | 51 (46.4) | 65 (40.4) |  |

Alb, albumin; BMI, body mass index; GNRI, geriatric nutritional risk index.
